# Supplementary material for: Pb2+binding to lentil lectin and its influence on the protein aggregation
Source: Royal Society of Chemistry journal article supplement (doi:10.1039/c5ra06427a), 2015-01-01
Supplement: c5ra06427a1.pdf [file c5ra06427a1.pdf]

## Supporting Information

**Atul Gajanan Thawari, Khatija Tabbassum, Vijaya Kumar Hinge and Chebrolu Pulla Rao**

Bioinorganic Laboratory, Department of Chemistry, Indian Institute of Technology  
Bombay, Powai, Mumbai – 400 076; E-mail: cprao@iitb.ac.in

### Contents

#### SI 01: SDS-PAGE and Haemagglutination (Rabbit RBCs) assay of LL

Lentil lectin is a dimer of 48 kDa with two heavy chains of 17 kDa each and two light chains of 7 kDa each, hence two bands correspond to 17 and 7 kDa were observed in SDS-PAGE. The agglutination studies carried out with the rabbit RBC's using this protein supports the lectin characteristics.

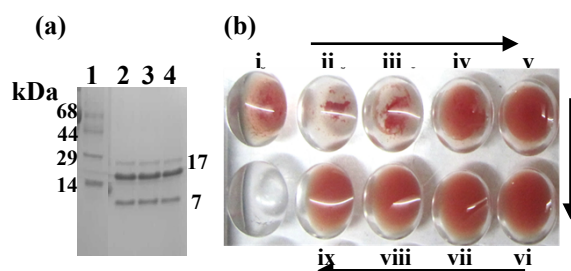

**Figure S01** (a) SDS-PAGE of LL; (Lane1- Marker, 2, 3 and 4 are mannose affinity chromatography fractions. (b) Haemagglutination (Rabbit RBCs) assay of LL. LL was serially diluted from 500  $\mu\text{g}$  to 1.85  $\mu\text{g}$  (i to ix) visual precipitate were found up to the 60  $\mu\text{g}$  (iv) of LL.
